# Supplementary material for: A Diffusion Tensor Imaging Study in Children With ADHD, Autism Spectrum Disorder, OCD, and Matched Controls: Distinct and Non-Distinct White Matter Disruption and Dimensional Brain-Behavior Relationships
Source: Atypon-hosted journal article supplement (doi:10.1176/appi.ajp.2016.15111435), 2016-07-01
Supplement: appi.ajp.2016.15111435.ds001.pdf [file appi.ajp.2016.15111435.ds001.pdf]

 


Psychiatry Online
